# Supplementary material for: Age and Ageing to introduce a new category of paper: healthcare improvement science
Source: Oxford University Press journal article supplement (doi:10.1093/ageing/afy175), 2018-10-25
Supplement: afy175_aa-18-0800-file002.docx [file afy175_aa-18-0800-file002.docx]

Age and Ageing to introduce a new category of paper: healthcare improvement science

S G Parker (1), T Downes (2), M Godfrey (3), R Matthews (4), F C Martin (5).

**Supplementary Data**

**Appendix 1. Full list of references.**

1. Ogrinc G, Davies L, Goodman D, et al SQUIRE 2.0 (Standards for QUality Improvement Reporting Excellence): revised publication guidelines from a detailed consensus process BMJ Qual Saf Published Online First: 14 September 2015. doi: 10.1136/bmjqs-2015-004411
2. Goodman D, Ogrinc G, Davies L, et al. Explanation and elaboration of the SQUIRE (Standards for Quality Improvement Reporting Excellence) Guidelines, V.2.0: examples of SQUIRE elements in the healthcare improvement literature. BMJ Qual Saf Published Online First published 27 April 22016: doi:10.1136/ bmjqs-2015-004480
3. Institute of Medicine. Crossing the quality chasm: a new health system for the 21st century. Washington, DC: Institute of Medicine, 2001.
4. The Health Foundation Quality Improvement Made Simple. https://www.health.org.uk/sites/health/files/QualityImprovementMadeSimple.pdf Accessed 14th August 2018.
5. Burnett S, Franklin BD, Moorthy K, Cooke MW, Vincent C . How reliable are clinical systems in the UK NHS? A study of seven NHS organisations. BMJ Qual Saf 2012;21:466 – 72.
6. Trump D. Reported in: https://edition.cnn.com/2017/02/27/politics/trump-health-care-complicated/index.html. Accessed 2nd August 2018.
7. Braithwaite J, Churruca K, Long JC, Ellis LA, Herkes J. When complexity science meets implementation science: a theoretical and empirical analysis of systems change. BMC Medicine 2018;16:63 https://doi.org/10.1186/s12916-018-1057-z
8. Øvretveit J. Does improving quality save money? A review of the evidence of which improvements to quality reduce costs to health service providers. London: Health Foundation, 2009.
9. https://en.wikipedia.org/wiki/W._Edwards_Deming Accessed 14th August 2018.
10. https://en.wikipedia.org/wiki/Walter_A._Shewhart Accessed 14th August 2018.
11. https://en.wikipedia.org/wiki/Ronald_Fisher Accessed 19th August 2018.
12. https://en.wikipedia.org/wiki/William_Sealy_Gosset Accessed 19th August 2018.
13. Graham ID, Harrison MB, Strauss SE et al. Lost in knowledge translation: Time for a map? https://doi.org/10.1002/chp.47
14. Institute of Healthcare Improvement http://www.ihi.org/resources/Pages/HowtoImprove/default.asp Accessed 1st September 2018..
15. NHS England Change Model 2012 https://www.england.nhs.uk/sustainableimprovement/change-model/
16. NHS England. [https://www.england.nhs.uk/wp-content/uploads/2018/04/change-model-guide-v5.pdf Accessed 3rd September 2018](https://www.england.nhs.uk/wp-content/uploads/2018/04/change-model-guide-v5.pdf%20Accessed%203rd%20September%202018)
17. Portela MC, Pronovost PJ, Woodcock T, et al. How to study improvement interventions: a brief overview of possible study types. BMJ Qual Saf 2015;24:325-336. doi:10.1136/bmjqs-2014-003620
18. https://improvement.nhs.uk/resources/ Accessed 3rd September 2018
19. Healthcare Quality Improvement Partnership A guide to quality improvement methods 2015 https://nhfd.co.uk/20/hipfracturer.nsf/b83841ab51769e1d802581a4005978ed/205c2976b502ffc2802581ee0053a23f/$FILE/HQIP%20guide%20to%20QI%202017.pdf Accessed 6th September 2018.
20. Issen L, Woodcock T, McNicholas C, Lennox L, Reed JE. Criteria for evaluating programme theory diagrams in quality improvement initiatives: a structured method for appraisal. International Journal for Quality in Health Care 2018;30(7):508–513. https://doi.org/10.1093/intqhc/mzy063
21. Reed JE, Card AJ The problem with Plan-Do-Study-Act cycles BMJ Qual Saf 2016;25:147-152.
22. Øvretveit J. Understanding the conditions for improvement: research to discover which context influences affect improvement success. BMJ Qual Saf 2011;20 (Suppl 1):18–23.
23. Kaplan HC, Provost LP, Froehle CM, et al The Model for Understanding Success in Quality (MUSIQ): building a theory of context in healthcare quality improvement BMJ Qual Saf 2012;21:13-20.
24. Speroff T, James BC, Nelson EC, et al. Guidelines for appraisal and publication of PDSA quality improvement. Qual Manag Health Care 2004;13:33–9.
25. Taylor MJ, McNicholas C, Nicolay C, et al. Systematic review of the application of the plan–do–study–act method to improve quality in healthcare. BMJ Qual Saf 2014;23:290–298.
26. . Shewhart WA. Economic control of quality of manufactured product. New York: D. Van Nostrand Company, Inc, 1931.
27. Benneyan JC, Lloyd RC, Plsek PE. Statistical process control as a tool for research and healthcare improvement. Qual Saf Health Care 2003;12:458–64.
28. NHS Improvement Making Data Count 2018 https://improvement.nhs.uk/documents/2748/NHS_MAKING_DATA_COUNT_FINAL.pdf Accessed 6th September 2018.
29. . Mohammed MA: Using statistical process control to improve the quality of health care. Qual Saf Health Care 2004, 13:243–245.
30. Ferlie EB, Shortell SM. Improving the quality of health care in the United Kingdom and the United States: a framework for change. Milbank Q. 2001;79(2):281-315.
31. Greenhalgh T, Robert G, Macfarlane F, Bate P, Kyriakidou O. Diffusion of innovations in service organizations: systematic review and recommendations. Milbank Q. 2004;82(4):581-629.
32. Grol RP, Bosch MC, Hulscher ME, Eccles MP, Wensing M. Planning and studying improvement in patient care: the use of theoretical perspectives. Milbank Q. 2007;85(1):93-138
33. Kitson A, Rycroft-Malone J, Harvey G, McCormack B, Seers K, Titchen A. Evaluating the successful implementation of evidence into practice using the PARiHS framework: theoretical and practical challenges. Implement Sci 2008; 3:1 doi.org/10.1186/1748-5908-3-1
34. Kaplan HC, Brady PW, Dritz MC, Hooper DK, Linam WM, Froehle CM, Margolis P. The influence of context on quality improvement success in health care: a systematic review of the literature. Milbank Q. 2010;88(4):500-59.
35. Damschroder LJ, Aron DC, Keith RE, Kirsh SR, Alexander JA, Lowery JC. Fostering implementation of health services research findings into practice: a consolidated framework for advancing implementation science. Implement Sci. 2009;4:50. DOI: 10.1186/1748-5908-4-50.
36. Fixsen DL, Naoom SF, Blase KA, Friedman RM, Wallace F. Implementation research: a synthesis of the literature. Tampa, FL: University of South Florida, Louis de la Parte Florida Mental Health Institute, National Implementation Research Network (FMHI Publication #231);2005.
37. Hoffman TC, Glasziou PP, Boutron I et al. Better reporting of interventions: template for intervention description and replication (TIDieR) checklist and guide. BMJ 2014;348:g1687
38. Scoville R, Little K, Rakover J, Luther K, Mate K. Sustaining Improvement. IHI White Paper. Cambridge, Massachusetts: Institute for Healthcare Improvement; 2016. (Available at ihi.org)
39. Lennox L, Maher L, Reed J. Navigating the sustainability landscape: a systematic review of sustainability approaches in healthcare. Implementation Science 2018;13:27 DOI 10.1186/s13012-017-0707-4
40. May C, Finch T. Implementing, Embedding, and Integrating Practices: An Outline of Normalization Process Theory. Sociology 2009;4:3. https://doi.org/10.1177/0038038509103208
41. Darzi A Healthcare for London: A Framework for Action (2007). Available at http://www.nhshistory.net/darzilondon.pdf Accessed 6th September 2018.
42. Albury D, Beresford T, Dew S, Horton T, Illingworth J, Langford J. AGAINST THE ODDS: Successfully scaling innovation in the NHS. The Health Foundation, London (2018). Available at https://www.health.org.uk/publication/against-odds-successfully-scaling-innovation-nhs Accessed 6th September 2018.
43. Wells S, Tamir O, Gray J, Naidoo D, Bekhit M, Goldmann D. Are quality improvement collaboratives effective? A systematic review. BMJ Qual Saf 2018;27:226–240
44. Institute for Healthcare Improvement The Breakthrough Series: IHI’s Collaborative Model for Achieving Breakthrough Improvement (2003) http://www.ihi.org/resources/Pages/IHIWhitePapers/TheBreakthroughSeriesIHIsCollaborativeModelforAchievingBreakthroughImprovement.aspx Accessed 6th September 2018.
45. Pronovost, PJ, Goeschel CA, Colantuoni E. et al. Sustaining reductions in catheter related bloodstream infections in Michigan intensive care units: observational study. BMJ 2010; 340:c309
46. Cognitive Decline Partnership Centre (University of Sydney) http://sydney.edu.au/medicine/cdpc/.[accessed October 05 2018]
47. Legido-Quigley H, McKee M, Nolte E, A Glino IA. Assuring the quality of health care in the European Union. A case for action. Copenhagen: European Observatory on Health Systems and Policies 2008. ISBN 978 92 890 7193 2
48. Mason S, Nicolay C, Darzi A. The use of Lean and Six Sigma methodologies in surgery: a systematic review. Surgeon 2015;1: 91 – 100 .
49. Moraros J, Lemstra M, Nwankwo C . Lean interventions in healthcare: do they actually work? A systematic literature review. Int J Qual Health Care 2016;28:150 – 65.
50. Nicolay CR, Purkayastha S, Greenhalgh A, et al. Systematic review of the application of quality improvement methodologies from the manufacturing industry to surgical healthcare. Br J Surg 2012;99:324–35.
51. Dixon-Woods M and Martin GP. Does quality improvement improve quality? Future Hospital Journal 2016; (3):191–4.
52. Braithwaite J, Marks D, Taylor N, Harnessing implementation science to improve care quality and patient safety: a systematic review of targeted literature. Int J Qual Health Care 2014;26(3):321–329
53. Reed JE, Howe C, Doyle C, Bell D. Simple rules for evidence translation in complex systems: A qualitative study.BMC Med. 2018;16: 92. Published online 2018 Jun 20. doi: 10.1186/s12916-018-1076-9
54. Dixon-Woods M, Leslie M, Bion J, Tarrant C. What counts? A ethnographic study of infection data reported to a patient safety program. The Milbank Quarterly 2012;90 (3):548-591.
55. Godfrey M, Young J, Shannon, R et al. The Person, Interactions and Environment Programme to improve care of people with dementia in hospital: a multisite study. Health Services and Delivery Research 2018;6 (23):1-154.
56. Healthcare Quality Improvement Partnership (HQIP) Guide to managing ethical issues in quality improvement or clinical audit projects https://www.hqip.org.uk/wp-content/uploads/2017/02/guide-to-managing-ethical-issues-in-quality-improvement-or-clinical-audit-projects.pdf
57. Mockford C, Staniszewska S, Griffiths F, Herron-Marx F. The impact of patient and public involvement on UK NHS healthcare: a systematic review. International Journal for Quality in Health Care 2012;24(1):28–38.
58. Ocloo J, Matthews R From tokenism to empowerment: progressing patient and public involvement in healthcare improvement. BMJ Qual Saf 2016;25:626-632.
59. Batalden M, Batalden P, Margolis P, Seid M, Armstrong G, Opipari-Arrigan L, Hartung H. Coproduction of healthcare service. BMJ Qual Saf 2016;25:509-517.. doi:10.1136/bmjqs-2015-004315
60. Green SA, Evans L, Matthews R, Jayacodi S, Trite J, Manickam A, Evered R, Green J, Williams J, Beveridge E, Parker C, Tiplady B. "Service user engagement in quality improvement: applying the national involvement standards", The Journal of Mental Health Training, Education and Practice 2016;11(5):279-285. https://doi.org/10.1108/JMHTEP-02-2016-0011
61. Green SA, Carnegie W, Barber S, Matthew D, Matthews R, Co-designing within quality improvement initiatives: Notes from the field. JHD. 2018;3(1):49–56. doi.org/10.21853/JHD.2018.38
